# Supplementary material for: A second update on mapping the human genetic architecture of COVID-19
Source: bioRxiv or medRxiv preprint supplement (doi:10.1101/2022.12.24.22283874), 2023-04-04

SARS-CoV-2

reported infection

1:155162930:G:A

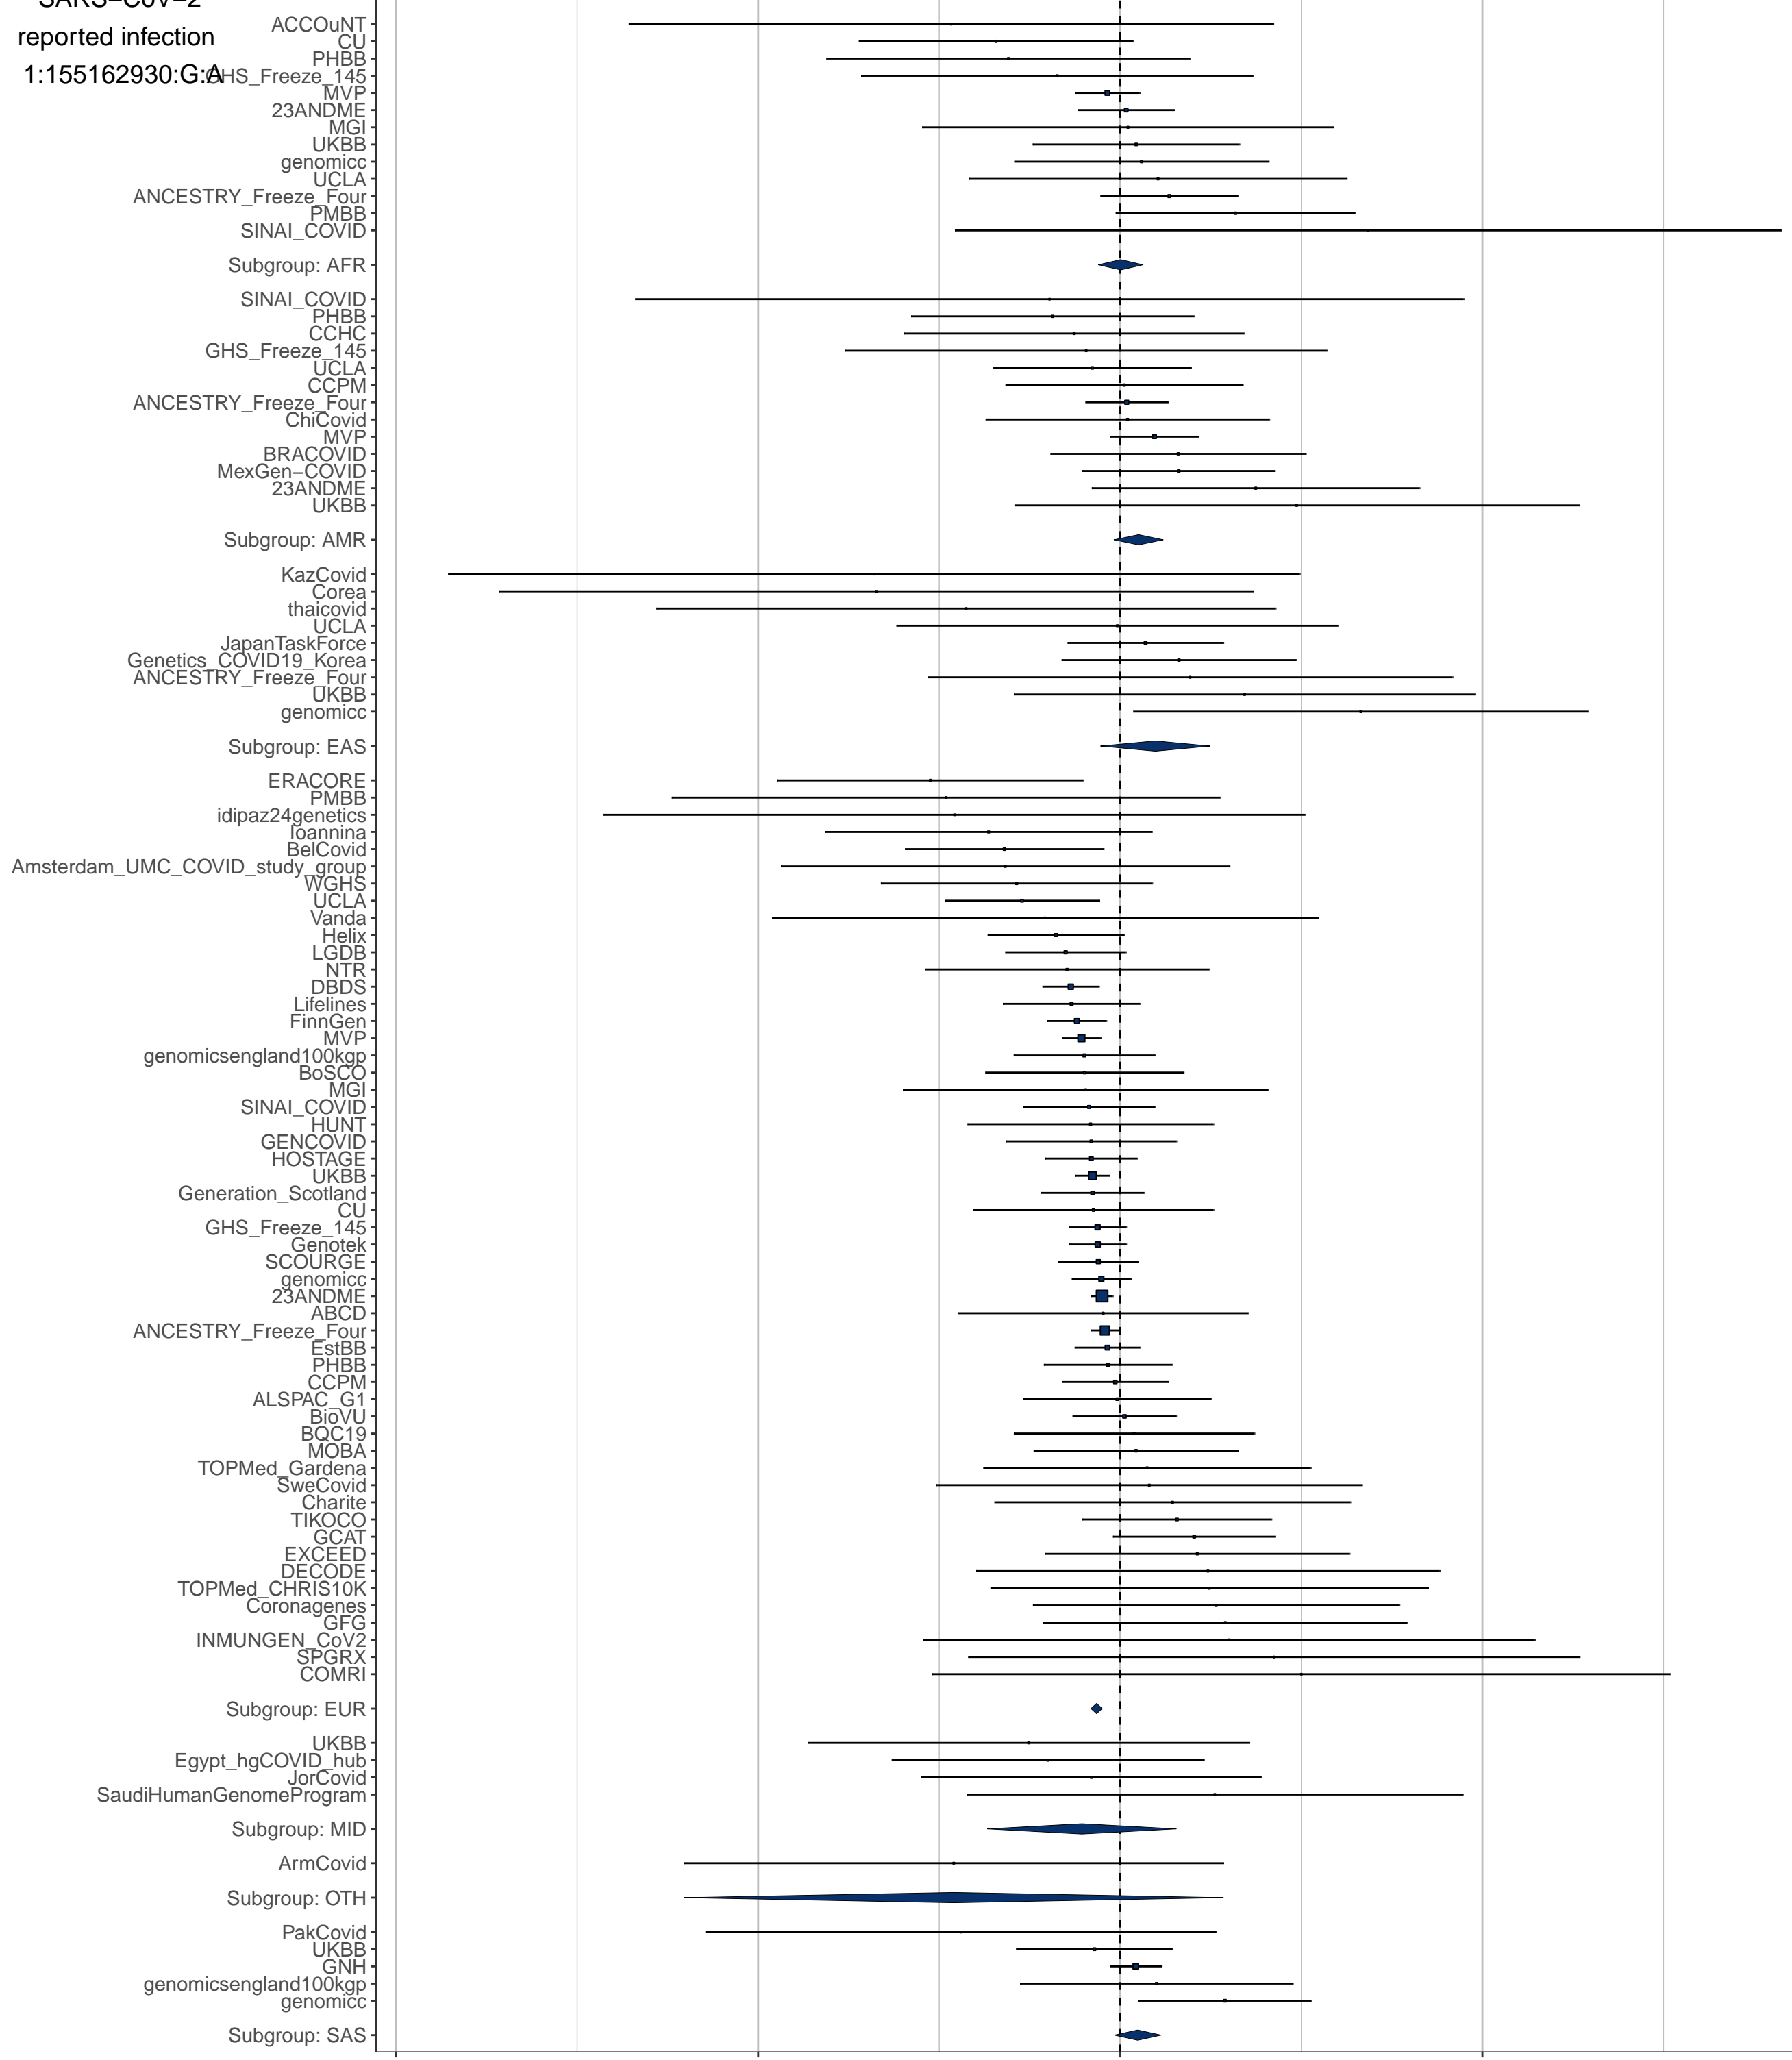

0.368 0.607 OR 1 1.649

Summary effect

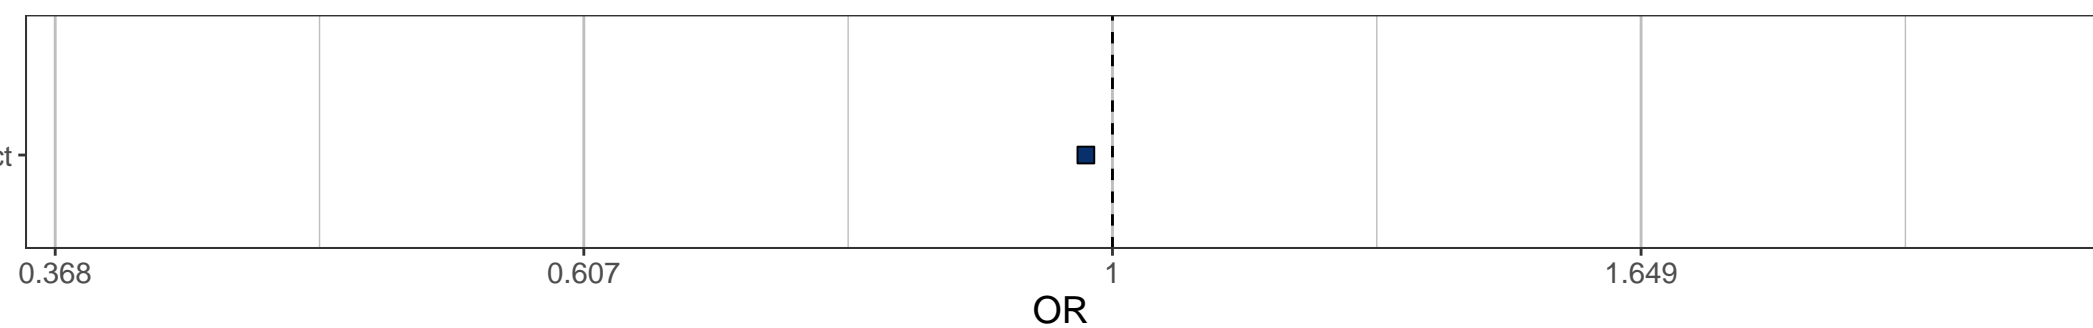

0.368 0.607 OR 1 1.649

Hospitalized COVID19+

6:41520640:G:A

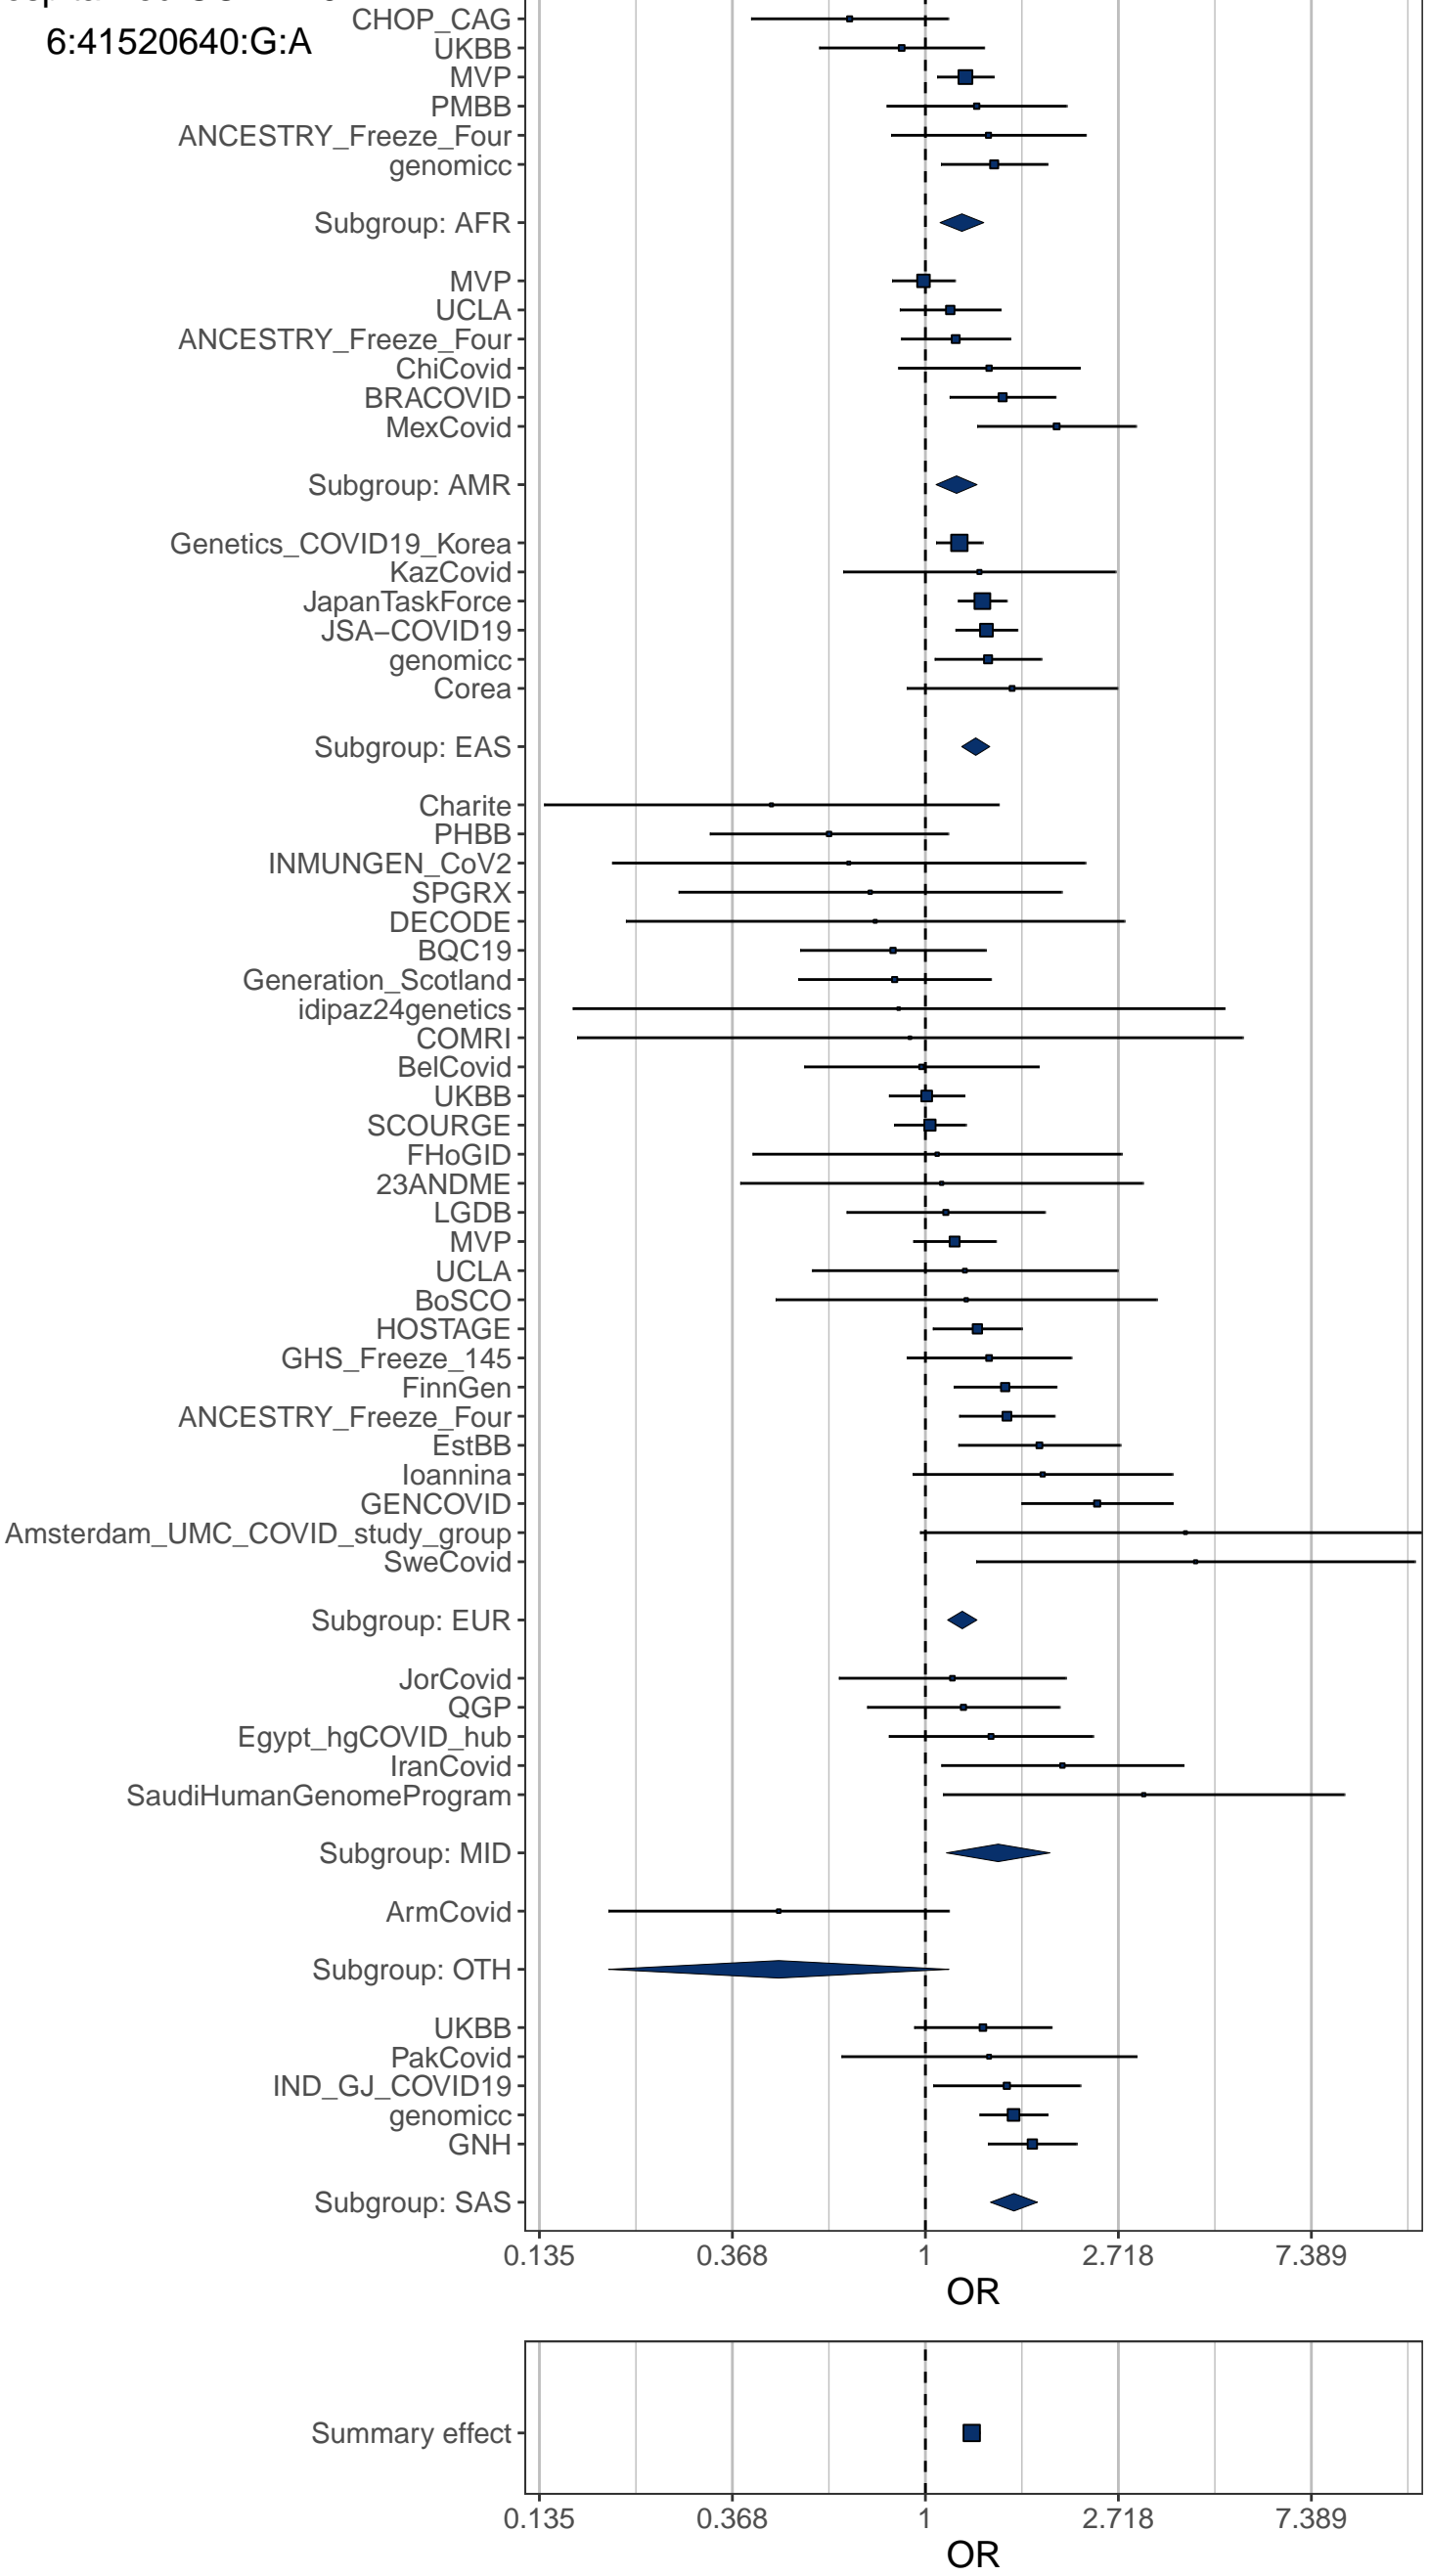

Supplement: Supplementary file [file media-2.pdf]
